# Supplementary material
Source: Springer Nature journal article supplement (https://www.springermedizin.de/resource/supplementary/12913_2013_3031_MOESM3_ESM.pdf/9533356)
Supplement: MOESM3 [file 9533356]

All registered patients

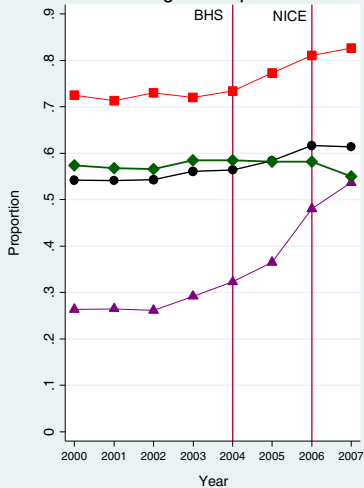

Newly registered patients

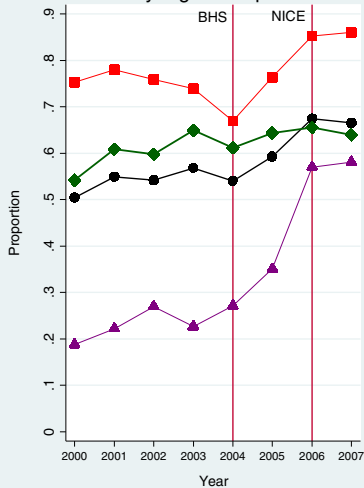

● All patients  
 ▲ Younger non-black patients

■ Black patients  
 ◆ Older non-black patients
